# Supplementary material
Source: PubMed Central journal article supplement (PMC3497506)
Supplement: JB.01007-12_zjb999092178so1.pdf [file JB.01007-12_zjb999092178so1.pdf]

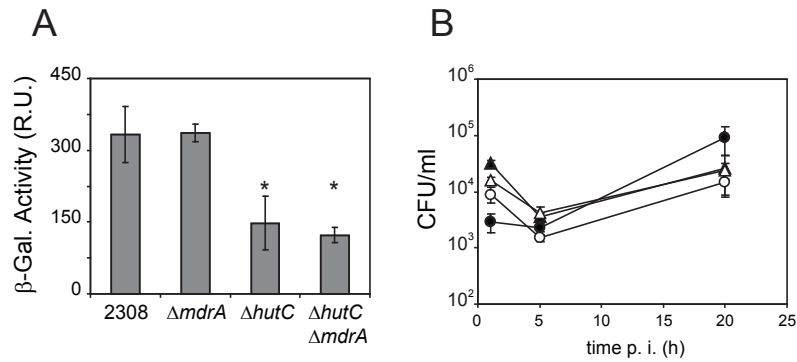

**Supplemental Figure S1:** A) Intracellular  $\beta$ -Gal activity of strain *B. abortus*  $P_{virB-lacZ}$  (2308), *B. abortus*  $\Delta mdrA P_{virB-lacZ}$  ( $\Delta mdrA$ ), *B. abortus*  $\Delta hutC P_{virB-lacZ}$  ( $\Delta hutC$ ), or the double mutant *B. abortus*  $\Delta mdrA \Delta hutC P_{virB-lacZ}$  ( $\Delta mdrA \Delta hutC$ ). Cultures of J774 macrophages were infected with strains harboring *lacZ* transcriptional fusions. At 5 h post infection (p.i.), cells were disrupted and  $\beta$ -Gal activity of intracellular bacteria was determined as described previously (Sieira *et al*, 2010. Journal of Bacteriology 192(1):217). B) Intracellular replication of *B. abortus* 2308 (black circles), the deletion mutants *B. abortus*  $\Delta mdrA$  (white circles), *B. abortus*  $\Delta hutC$  (black triangles), or the double mutant *B. abortus*  $\Delta mdrA \Delta hutC$  (white triangles) in J774 macrophages. Macrophages ( $1 \times 10^5$  per well) were inoculated with  $5 \times 10^6$  CFU of bacteria. After 1 h of incubation at  $37^\circ\text{C}$ , cells were washed with PBS, and gentamicin and streptomycin were added. CFU were determined at the indicated times. \*,  $P < 0.05$ .
